1 **Uncertainty in serious illness:**  
2 **A national interdisciplinary consensus exercise to identify clinical research priorities**  
3

4  
5 **Authors** Simon N Etkind<sup>1,2\*</sup>, Stephen Barclay<sup>1</sup>, Anna Spathis<sup>1,2</sup>, Sarah A Hopkins<sup>1</sup>, Ben Bowers<sup>1</sup>, Jonathan  
6 Koffman<sup>3</sup>  
7

8 **Affiliations**

- 9 1. Primary Care Unit, Department of Public Health and Primary Care, University of Cambridge  
10 2. Cambridge University Hospitals NHS Foundation Trust  
11 3. Hull York Medical School, University of Hull  
12 \* corresponding author  
13  
14

15 **Corresponding author contact details and address**

16 Simon Etkind

17 [Sde23@medschl.cam.ac.uk](mailto:Sde23@medschl.cam.ac.uk)

18 Primary Care Unit, Department of Public Health and Primary Care, East Forvie Building, Addenbrookes  
19 Biomedical Campus, CB2 0SR  
20  
21

22 **Abstract:**

23 Background: Serious illness is characterised by uncertainty, particularly in older age groups. Uncertainty  
24 may be experienced by patients, family carers, and health professionals about a broad variety of issues.  
25 There are many evidence gaps regarding the experience and management of uncertainty.

26 Aim: We aimed to identify priority research areas concerning uncertainty in serious illness, to ensure that  
27 future research better meets the needs of those affected by uncertainty and reduce research  
28 inefficiencies.

29 Methods: Rapid prioritisation workshop comprising five focus groups to identify research areas, followed  
30 by a ranking exercise to prioritise them. Participants were healthcare professionals caring for those with  
31 serious illnesses including geriatrics, palliative care, intensive care; researchers; patient/carer  
32 representatives, and policymakers. Descriptive analysis of ranking data and qualitative framework  
33 analysis of focus group transcripts was undertaken.

34 Results: Thirty-four participants took part; 67% female, mean age 47 (range 33 – 67). The highest priority  
35 was communication of uncertainty, ranked first by 15 participants (overall ranking score 1.59/3).  
36 Subsequent priorities were: 2) How to cope with uncertainty; 3) healthcare professional  
37 education/training; 4) Optimising clinical approaches to uncertainty; and 5) exploring in-depth  
38 experiences of uncertainty. Research related to optimally managing uncertainty was given higher priority  
39 than research focusing on experiences of uncertainty and its impact.

40 Conclusions: These co-produced, clinically-focused research priorities map out key evidence gaps  
41 concerning uncertainty in serious illness. Managing uncertainty is the most pressing issue, and  
42 researchers should prioritise how to optimally manage uncertainty in order to reduce distress, unlock  
43 decision paralysis and improve illness and care experience.

44  
45 **Key words**

46 Uncertainty; Communication; Serious illness; Palliative care; Qualitative research  
47  
48

49 **Key points**

- 50
- 51 • Uncertainty is ubiquitous and distressing in serious illness, and can paralyse decision making
  - 52 • In this consensus exercise, stakeholders identified research priorities for uncertainty in serious illness
  - 53 • Communication of uncertainty was the highest priority
  - 54 • Participants prioritised research concerning managing uncertainty above research to understand  
55 experiences of uncertainty
- 56

## 57 **Background**

58 Uncertainty is ubiquitous in serious illnesses across all health settings, especially when living with long-  
59 term conditions and frailty.[1-5] Encompassing “known unknowns”, uncertainty is characterised as an  
60 inadequate understanding, a sense of incomplete, ambiguous or unreliable information, and conflicting  
61 alternatives.[6, 7] It is inherently a complex concept and situations of uncertainty often result from  
62 several inter-related factors.[8]

63

64 Irrespective of its origin, uncertainty matters because when suppressed and ignored, it can profoundly  
65 negatively impact patients and their family.[9, 10] Older adults may be particularly affected as they  
66 commonly experience complex and unpredictable illness, associated with irreducible uncertainties.  
67 Uncertainty may precipitate extensive psychological and existential distress, potentially culminating in an  
68 experience of ‘Total Uncertainty’ which may threaten an individual’s sense-of-self.[11]

69

70 If uncertainty is not addressed it may impact patient safety, adverse events, healthcare interactions and  
71 relationships.[12, 13] One metric where this is recorded are complaints levelled at healthcare,  
72 particularly in hospital settings.[14] Uncertainty can also limit patient participation in decision-making,  
73 leading to ‘decision paralysis’,[15, 16] which may contribute to sub-optimal care and has repercussions  
74 for the allocation of scarce health resources, including hospital admissions and longer inpatient stays.[17,  
75 18]

76

77 It is not just patients who are affected by uncertainty. Despite uncertainty in medicine dating back to  
78 Hippocrates, there exists a deeply rooted aversion to it in empirical medicine, where acknowledging  
79 uncertainty can have connotations of failure.[18, 19] If poorly tolerated by health professionals,  
80 uncertainty can adversely impact their confidence and competence, increasing the risk of moral injury,  
81 burnout and depression.[20-23] This was particularly evident during the Covid-19 pandemic.[24, 25]

82

83     Uncertainty in illness is not necessarily distressing; it may be appraised negatively, neutrally, or in some  
84     individuals, illnesses, and care circumstances, positively; for example holding onto prognostic uncertainty  
85     can in some circumstances enable people to retain hope.[26-28] The distress caused by uncertainty, and  
86     hence the block to decision making is therefore not inevitable; the negative impacts of uncertainty can  
87     be at least partially ameliorated if it is addressed and communicated sensitively.[29-31]

88  
89     There are innumerable possible situations of uncertainty, each of which may have its own optimal  
90     approach. We still do not know how best to approach and address it in older patients living with long-  
91     term or life-threatening illnesses in a way that best supports the individual and those involved in their  
92     care;[32, 33] although previous work has explored how to support communication of uncertainty, [34]  
93     uncertainty management,[12, 32] and shared decision making.[35] We do know that there can be no  
94     one-size-fits-all approach to uncertainty, as it is experienced differently in different clinical contexts, by  
95     different individuals.[6, 36] Uncertainties in some contexts may be more distressing than others and may  
96     require different approaches.[37] Despite the importance of uncertainty for patients and clinicians alike  
97     there has, to date, been no attempt to prioritise the most pressing areas to focus applied research on to  
98     improve care.

99  
100     We aimed to identify stakeholder priority research areas concerning uncertainty in serious illness, [38] to  
101     enable future research to more effectively meet the needs of those affected by uncertainty and to  
102     reduce research inefficiencies.[39, 40]

## 103 **Methods**

### 104 Design

105 National interdisciplinary one-day prioritisation workshop with a range of stakeholders: patient and carer  
106 representatives, clinicians, researchers, and policymakers. Reporting according to REPRISE guidance (see  
107 appendix).[41]

108

### 109 Patient and public involvement

110 A Patient and public involvement group supported development of the study aims and methods; 3 public  
111 contributors participated in the workshop, contributing to focus groups and the ranking exercise, and  
112 commented on the findings.

113

### 114 Participants and participant identification

115 Participants were clinicians, researchers, policymakers, people with lived experience of serious illness  
116 and their informal carers. Researchers and policymakers were eligible if they were interested in the area.  
117 Clinicians were from any profession or specialty with experience in providing care to people with serious  
118 illnesses. The workshop invitation was disseminated widely through clinical and research networks and  
119 social media, including: Applied Research Collaborative (ARC) East of England, UK uncertainty in serious  
120 illness specialist interest group, the UK-wide Community Nursing Research Forum, regional and national  
121 palliative care and gerontology contacts. Invitations were sent from December 2022, and registration  
122 was open until 27<sup>th</sup> February 2023. The workshop was held on 28<sup>th</sup> February 2023. Workshop attendees  
123 were informed of the research component in advance.

124

### 125 Workshop process

126 The workshop drew on existing approaches to prioritisation, incorporating idea generation,  
127 consolidation, and ranking stages.[42] Written informed consent and self-reported demographic data

128 were collected from workshop participants at the start of the day, including age, gender, ethnicity,  
129 participants' status as a researcher, clinician, policymaker, or patient representative, and details of their  
130 field where relevant. To encourage debate, the workshop began with presentations on the "state of the  
131 science" concerning uncertainty in serious illness. Models of uncertainty and evidence gaps from  
132 relevant literature reviews were outlined.[11, 32, 34, 43, 44]

133 We then held focus groups with participants to explore their views on uncertainty and identify key areas  
134 for future research. This approach mirrored the idea generation stage of the nominal group technique  
135 and the first round of a Delphi process.[42, 45] The topic guide was developed by the research team and  
136 was informed by literature review: it focused on experiences of uncertainty, views on desired outcomes  
137 when addressing uncertainty, and ideas for research questions concerning uncertainty in serious illness.  
138 Focus groups were led by clinicians and researchers with expertise in facilitation. Conversations were  
139 audio recorded and a scribe within each group recorded the research questions identified by  
140 participants.

141 Research areas from the focus groups were collated into a summary list during the day. In the final  
142 session, this summary list was presented to participants who were invited to anonymously rank the top  
143 three areas in order of priority using the online ranking tool "Slido" (© 2023 Cisco Systems, Inc.). Items  
144 were presented in random order. See appendix for full workshop programme and topic guide.

145

#### 146 Data analysis

147 *Analysis of focus group lists:* The lists generated by focus groups were reviewed by two researchers (SE &  
148 JK) during the day, taking into account both researchers' existing knowledge of evidence gaps and  
149 previously expressed areas for future research from literature reviews.(9, 28) The researchers combined  
150 the lists produced by each focus group by removing duplicates and arranging similar questions under  
151 "umbrella terms" to produce a single summary list of priority research areas for use in the subsequent  
152 ranking exercise.

153

154 *Analysis of ranking exercise data:* Individual-level ranking scores were exported from Slido. We analysed  
155 the scores descriptively and reported the number of participants ranking each item within their top  
156 three. We calculated an average ranking score by allocating points to each item as follows: the item  
157 ranked first received three points; the item ranked second received two points; the item ranked third  
158 received one point; all other items received zero points. The average ranking score was calculated by  
159 adding the points for each item and dividing by the number of participants. The maximum any item  
160 could score was three if every participant ranked it as their top priority and the minimum was zero if no  
161 participant ranked it in their top three.

162

163 *Analysis of focus group transcripts:* Following the workshop the focus group recordings were transcribed  
164 verbatim, anonymised and analysed using a framework approach.[46] This stage aimed to identify  
165 detailed research questions within the priority areas, as well as any additional areas discussed that were  
166 relevant for future research. We used the research priority areas identified during the workshop as a  
167 coding framework and one researcher (SE) coded text in the transcripts that described research  
168 questions or participants' views about these areas. A second researcher (JK) independently reviewed one  
169 focus group transcript. Coding was reviewed, and where there were differences, these issues were  
170 reconsidered and debated by both researchers until consensus was achieved.[46] To avoid making  
171 unwarranted claims about patterns and regularities in the data, we examined and coded unusual or non-  
172 confirmatory views that did not fit easily into the original framework.[46] The framework was  
173 condensed, summarised and discussed with the wider research team to refine it. Anonymised excerpts  
174 from the transcripts are presented to illustrate themes and represent a range of views.

175

176 Ethical approval: This study received approval from the University of Cambridge Psychology Research  
177 Ethics Committee [Reference:PRE.2022.125].

178 **Results**

179 Participant details

180 Thirty three participants took part in the focus groups, and 34 in the ranking survey, of whom 30  
181 provided demographic information. The average age was 47 years (range 33 – 67), and 67% were female.  
182 80% were of white ethnicity, 10% Asian, and 10% from mixed or multiple ethnic groups. 70% were  
183 clinicians, 43% researchers, 10% patient or carer representatives, and 7% policymakers (participants  
184 could state multiple roles). Of the clinician participants, twelve had a background in palliative care, three  
185 geriatrics, two nursing and one each of intensive care, general practice, psychology, and physiotherapy.

186

187 Item generation and ranking

188 Five focus groups with six to seven participants in each were of 53 to 64 minutes' duration. The groups  
189 generated 61 research questions, which we condensed to produce the 10 priority areas that were then  
190 ranked by participants (Table 1). Communication of uncertainty was the highest-ranked item, scored first  
191 by 15 participants. Participants ranked the next four priorities almost equally: coping with uncertainty;  
192 training health professionals; optimising clinical approaches to uncertainty; understanding in-depth  
193 experiences of uncertainty. The other areas received lower priority scores.

194



195 **Table 1. 10 priority areas for future uncertainty research in serious illness (n = 34):**

| Overall Ranking | Priority                                                                                           | Number of participants ranking item in each top 3 positions (%) |        |        | Percentage of participants ranking items in top three | Ranking score* |
|-----------------|----------------------------------------------------------------------------------------------------|-----------------------------------------------------------------|--------|--------|-------------------------------------------------------|----------------|
|                 |                                                                                                    | #1                                                              | #2     | #3     |                                                       |                |
| 1               | Communication of uncertainty                                                                       | 15 (44)                                                         | 3 (9)  | 3 (9)  | 62                                                    | 1.59           |
| 2               | How to cope with uncertainty                                                                       | 6 (18)                                                          | 5 (15) | 3 (9)  | 41                                                    | 0.91           |
| 3               | Education/training of healthcare professionals                                                     | 2 (6)                                                           | 7 (21) | 9 (26) | 53                                                    | 0.85           |
| 4               | Optimising clinical approaches to uncertainty                                                      | 6 (18)                                                          | 2 (6)  | 4 (12) | 35                                                    | 0.76           |
| 5               | Understanding patient/carer experiences of uncertainty in depth                                    | 2 (6)                                                           | 7 (26) | 5 (15) | 41                                                    | 0.74           |
| 6               | Variation in experience/response to uncertainty between different individuals, groups, professions | 1 (3)                                                           | 4 (12) | 1 (3)  | 18                                                    | 0.35           |
| 7               | Explore positive aspects of uncertainty                                                            | 1 (3)                                                           | 1 (3)  | 4 (12) | 18                                                    | 0.26           |
| 8               | Impact of uncertainty on bereavement                                                               | 1 (3)                                                           | 2 (6)  | 1 (3)  | 12                                                    | 0.24           |
| 9               | Uncertainty in specific conditions/clinical situations                                             | 0 (0)                                                           | 3 (9)  | 1 (3)  | 12                                                    | 0.21           |
| 10              | Factors associated with different uncertainty experiences                                          | 0 (0)                                                           | 0 (0)  | 1 (3)  | 9                                                     | 0.09           |

196 \*Calculated as follows: item ranked first receives 3 points; item ranked 2<sup>nd</sup> receives 2 points; item ranked 3<sup>rd</sup>  
 197 receives 1 point; all other items receive 0 points. The total points for each item are added and divided by the  
 198 number of participants.

199

200 Detailed research priorities

201 We explored the 10 priority areas raised by workshop participants during qualitative analysis, and  
 202 identified detailed sub-questions within each area (Table 2).

203

204 The highest priority research areas were related to managing uncertainty, by communication, supporting  
205 individual coping mechanisms, or providing training. Participants particularly focused on how and when  
206 to have conversations about uncertainty, and how to individualise communication to promote  
207 psychological wellbeing:

208 *“Then there’s a really important research need around understanding more about how we*  
209 *communicate uncertainty and the consequences of how we communicate uncertainty and how*  
210 *we can talk about uncertainty in a way which is more patient-centred and supportive and*  
211 *considers sort of psychological wellbeing.” Social scientist, focus group 3.*

212 Training of health professionals at varying stages was a recognised priority. This included training  
213 professionals on toleration of their uncertainty as well as how to address the uncertainty experienced by  
214 others. One participant highlighted that inadequate training of doctors to manage uncertainty has been  
215 a longstanding issue and queried the best timing of such training:

216 *“We’ve been inadequate at teaching them [medical students] how to actually manage this*  
217 *complexity for a long time, although you could argue that it’s quite difficult to teach until they*  
218 *really get into the nitty-gritty of practising.” Geriatrician, focus group 1*

219 Participants recognised it is unlikely a single intervention can address all the nuanced multilevel aspects  
220 of uncertainty, but nevertheless, some felt interventions could play a role in addressing uncertainty, as  
221 long as they were situated in a broader societal context:

222 *“There are interventions that are being developed out there but there are no interventions that*  
223 *deal with all the different types and layers of uncertainty and they can’t by nature. And I think*  
224 *there is that kind of relational uncertainty, the kind of organisational uncertainties, there are*  
225 *uncertainties on macro, meso, micro levels and you can deal with one component, but you can’t*  
226 *deal with all the different components, and it’s how those interventions work within the broader*  
227 *societal context of uncertainty.” Occupational therapist, focus group 4*

228 Older frail patients were seen as a priority for future research into how uncertainty can be managed.  
229 Participants noted a lack of knowledge about approaching uncertainty in the context of frailty:

230 *“For old and frail elderly there’s no support you know, for that anxiety, fear, so it’s how do we*  
231 *look at that, you know, and how do we maybe look at how we can support, supporting that*  
232 *frailty and older.” Professor of end-of-life care, focus group 5*

233

234 Participants identified research questions concerning *experiences* of uncertainty, though these were  
235 generally given lower priority than questions relating to *managing* uncertainty. Participants identified  
236 illness contexts where uncertainty experiences could be explored further, including critical illness and  
237 frailty. They also acknowledged it is important to explore how the experience of uncertainty varies  
238 depending on perspective (patient, carer or health professional), or individual characteristics:

239 *“We’d want to look at different groups such as sort of learning disability, neurodiversity, sort of*  
240 *hard-to-reach areas whether deprivation, LGBTQ+, sort of that kind of differences you might get.”*  
241 *Palliative care consultant, focus group 1.*

242 Participants identified potential positive impacts of uncertainty and its utility in certain situations. They  
243 suggested it was important to understand why some health professionals thrive when required to  
244 manage uncertainty, whereas others exhibit a lower tolerance. Participants noted the relationship  
245 between uncertainty and hope and reasoned that positive aspects of uncertainty should be explored  
246 further:

247 *“I wonder....whether there’s something about learning to cope with uncertainty or to tolerate*  
248 *uncertainty and whether people, patients and families can see that as a positive as well.”*  
249 *Bereavement practitioner, focus group 4*

250

#### 251 Additional areas for future research

252 Some questions identified from focus group transcripts were not identified as research priority areas by  
253 participants. Additional areas included consideration of the legal and regulatory implications of  
254 uncertainty and its management, the link between uncertainty and patient safety, how to prepare the  
255 public for serious illness uncertainty, and the resource impacts of different levels of tolerance to  
256 uncertainty:

257 *“Have we studied the use of resources around uncertainty? Because I’m sure loads of tests are*  
258 *done completely unnecessarily because people just want to be sure.” Palliative care consultant,*  
259 *group 1*

260 **Table 2. Detailed research priorities from framework analysis\***

| Theme                                                              | Priority area                                                                                                                                                | Detail of priority area                                                                                                                                                                                                                                                                                                                                                                                                                                                                                                                                                                                                                                                                                                                                                                                                                                                                                                                                                                 |
|--------------------------------------------------------------------|--------------------------------------------------------------------------------------------------------------------------------------------------------------|-----------------------------------------------------------------------------------------------------------------------------------------------------------------------------------------------------------------------------------------------------------------------------------------------------------------------------------------------------------------------------------------------------------------------------------------------------------------------------------------------------------------------------------------------------------------------------------------------------------------------------------------------------------------------------------------------------------------------------------------------------------------------------------------------------------------------------------------------------------------------------------------------------------------------------------------------------------------------------------------|
| <p style="text-align: center;">Uncertainty<br/>managemen<br/>t</p> | <p>Communication of uncertainty<br/><br/>(research on how best to communicate about uncertainty)</p>                                                         | <ul style="list-style-type: none"> <li>• Understand more about the detailed processes for uncertainty communication: who should be involved, optimum setting &amp; timing, what phrases to use; how much uncertainty to share; how are such conversations received by patients</li> <li>• How to communicate uncertainty openly whilst maintaining a trusting relationship?</li> <li>• Interprofessional communication</li> <li>• How to individualise communication of uncertainty to different settings, situations, individual characteristics?</li> <li>• How does the communication of uncertainty affect decision-making and other outcomes?</li> </ul>                                                                                                                                                                                                                                                                                                                           |
|                                                                    | <p>How to cope with uncertainty<br/><br/>(how can individuals best be supported to cope with their uncertainties)</p>                                        | <ul style="list-style-type: none"> <li>• How do health professionals cope when they feel uncertain and how do they achieve resilience/tolerance to it?</li> <li>• How can patients and carers be supported to cope with their uncertainty and develop resilience?</li> <li>• Who copes well and why?</li> <li>• How to cope with the long-term impact of decisions made under conditions of uncertainty?</li> <li>• What is the role of hope in coping with uncertainty?</li> </ul>                                                                                                                                                                                                                                                                                                                                                                                                                                                                                                     |
|                                                                    | <p>Education/training of healthcare professionals (how can we train health professionals to approach uncertainty)</p>                                        | <ul style="list-style-type: none"> <li>• How to teach uncertainty management to medical students, what would be the goals of such training?</li> <li>• How to train HCPs at different levels to recognise/tolerate/hold their own uncertainty?</li> <li>• How to transfer expertise from areas where uncertainty is well managed?</li> <li>• Development of training interventions including psychological training</li> </ul>                                                                                                                                                                                                                                                                                                                                                                                                                                                                                                                                                          |
|                                                                    | <p>Optimising clinical approaches to uncertainty<br/><br/>(how can the uncertainty of others best be managed and addressed, what are optimal approaches)</p> | <ul style="list-style-type: none"> <li>• How to individualise the management of uncertainty depending on patient experiences, response to uncertainty, and how to identify how much uncertainty is tolerable to an individual?</li> <li>• Who should 'hold' uncertainty and how to find a balance in terms of information sharing and decision-making</li> <li>• How to maintain trust and manage expectations?</li> <li>• How to gauge the readiness of people to discuss uncertainty and time conversations?</li> <li>• How can technology be used to distil information and reduce/address uncertainty relating to complexity/information overload?</li> <li>• What is the role of uncertainty management interventions and models of care to address uncertainty, and how effective are these?</li> <li>• What are the key outcomes we should be aiming for when seeking to approach and manage uncertainty?</li> <li>• What are the barriers to addressing uncertainty?</li> </ul> |

|                         |                                                                                                                                                                 |                                                                                                                                                                                                                                                                                                                                                                                                                                                                                                                                                                                                                                                                                                      |
|-------------------------|-----------------------------------------------------------------------------------------------------------------------------------------------------------------|------------------------------------------------------------------------------------------------------------------------------------------------------------------------------------------------------------------------------------------------------------------------------------------------------------------------------------------------------------------------------------------------------------------------------------------------------------------------------------------------------------------------------------------------------------------------------------------------------------------------------------------------------------------------------------------------------|
|                         |                                                                                                                                                                 | <ul style="list-style-type: none"> <li>• How to manage uncertainty as an MDT and maintain continuity of approach</li> </ul>                                                                                                                                                                                                                                                                                                                                                                                                                                                                                                                                                                          |
| Uncertainty experiences | <p>Understanding patient/carer experiences of uncertainty in depth</p> <p>(what are patient and carer experiences of uncertainty)</p>                           | <ul style="list-style-type: none"> <li>• How does the experience of uncertainty affect decision-making?</li> <li>• What is the lived experience of uncertainty amongst patients and families (what is helpful when faced with uncertainty and what is harmful? How do the multiple layers of uncertainty interact within an individual's experience (mapping uncertainty)? Are the experiences/impacts of different types of uncertainty different? How do past life or healthcare experiences affect current uncertainty experiences.)?</li> <li>• How is uncertainty transmissible i.e. how can HCP uncertainty be picked up by patients and vice versa and what is the effect of this?</li> </ul> |
|                         | <p>Variation in experience/ response to uncertainty</p> <p>(how does the experience of uncertainty vary between different groups)</p>                           | <ul style="list-style-type: none"> <li>• How does experience and response to uncertainty vary between different medical specialties and health professional groups?</li> <li>• How does experience and response to uncertainty change over time as the illness progresses.</li> <li>• How do individual characteristics e.g. culture, LGBTQ status, neurodiversity, age, affect experience and response to uncertainty?</li> <li>• How does career stage and knowledge/experience in a clinical role affect health professionals experience?</li> <li>• What are the long-term effects of uncertainty experiences in ITU on ITU survivors?</li> </ul>                                                |
|                         | <p>Explore positive aspects of uncertainty</p> <p>(what aspects of uncertainty are positive and how can these be promoted)</p>                                  | <ul style="list-style-type: none"> <li>• What is the relationship between sharing uncertainty and maintaining hope?</li> <li>• Explore positive utility of uncertainty e.g. as a way to promote a quest for knowledge or changing ways of thinking</li> <li>• Explore why some people thrive with uncertainty</li> </ul>                                                                                                                                                                                                                                                                                                                                                                             |
|                         | <p>Impact of uncertainty on bereavement</p> <p>(how does uncertainty in serious illness impact on bereavement experiences)</p>                                  | <ul style="list-style-type: none"> <li>• How does uncertainty in serious illness and at the end of life affect experiences and outcomes of bereavement?</li> </ul>                                                                                                                                                                                                                                                                                                                                                                                                                                                                                                                                   |
|                         | <p>Uncertainty in specific conditions/clinical situations</p> <p>(the uncertainties that are experienced in a particular clinical situation such as in ITU)</p> | <ul style="list-style-type: none"> <li>• How do different clinical situations change how uncertainty is experienced and responded to?</li> <li>• Are there situations where the expression of uncertainty is not appropriate?</li> <li>• How to make good decisions in the context of uncertainty in the intensive care unit?</li> <li>• How is uncertainty experienced in children with complex neuro-disability?</li> <li>• How to approach uncertainty in adults with neurodegenerative disease and uncertain illness trajectory?</li> <li>• How to approach uncertainty in frailty with uncertain prognosis?</li> </ul>                                                                          |

|  |                                                                                                                                                                  |                                                                                                                                                                                                                                                                                                                                                                                                        |
|--|------------------------------------------------------------------------------------------------------------------------------------------------------------------|--------------------------------------------------------------------------------------------------------------------------------------------------------------------------------------------------------------------------------------------------------------------------------------------------------------------------------------------------------------------------------------------------------|
|  |                                                                                                                                                                  | <ul style="list-style-type: none"> <li>• How to communicate uncertainty at transitions of care</li> </ul>                                                                                                                                                                                                                                                                                              |
|  | <p>Factors associated with different uncertainty experiences</p> <p>(what factors are associated with different experiences of or responses to uncertainty.)</p> | <ul style="list-style-type: none"> <li>• What system factors underlie the challenges of uncertainty?</li> <li>• What factors are associated with uncertainty experiences and tolerance e.g. age, life experience, culture?</li> <li>• How did the COVID-19 pandemic affect experiences and response to uncertainty?</li> <li>• How does trust in clinicians affect uncertainty experiences?</li> </ul> |

261

\*Priority areas are listed in the order they were ranked

262 **Discussion**

263 Summary of findings

264 This study co-produced clinically-focused research priorities to address known evidence gaps  
265 concerning uncertainty in serious illness. Optimising communication of uncertainty was the top  
266 research priority. Research into managing uncertainty was considered higher priority than research  
267 investigating experiences of uncertainty.

268

269 Discussion of main findings

270 Communicating uncertainty was the top priority for participants, reflecting key evidence gaps and  
271 recommendations in this field.[32, 47] In their narrative review of uncertainty communication,  
272 Simpkin et al identified a number of evidence gaps, including identifying individuals' communication  
273 preferences and tailoring communication to those preferences.[34] The question of how to maintain  
274 hope whilst communicating uncertainty was noted as a priority; this has been explored in cancer  
275 care,[48] but remains a key question in other serious illnesses. Additionally, participants raised  
276 several sub-questions in terms of *how* to discuss uncertainty, reflecting the need for  
277 implementation-focused communication research.

278 After communication, participants prioritised other aspects of managing uncertainty: identifying  
279 how individuals can be supported to cope with their own uncertainty; investigating how we can  
280 optimise clinical approaches to uncertainty; understanding more about how to equip health  
281 professionals to deal with uncertainty through training. Though management of uncertainty has  
282 been recognised as a core component of medical training for decades, curricula still make limited  
283 reference to uncertainty, and filling this gap should be a priority.(2) Whilst we have an improving  
284 understanding of how physicians manage uncertainty,[31] the evidence base for other professional  
285 groups is very limited, yet nurses and allied healthcare professionals often lead the clinical care and  
286 support of older people and their families. To date, uncertainty management and communication  
287 interventions have had variable impact in serious illness,[32] and often prove challenging to

288 evaluate.[33, 49] There is scope for further intervention development,[50] especially work that  
289 focuses on evaluation of uncertainty-focused interventions.

290 Whilst many of the questions identified by participants related to investigating experiences of  
291 uncertainty, these were usually considered lower priority, perhaps because much is already known  
292 about uncertainty experiences.[7, 51] For example, conceptual taxonomies of uncertainty are well  
293 developed,(6) and there have been evidence syntheses of experience in some specific areas e.g.  
294 multimorbidity.[11] However, there are still evidence gaps concerning how uncertainty affects  
295 individuals in other clinical contexts, in particular older patients living with frailty. Given the rapidly  
296 increasing complexity of the healthcare system and unpredictability of the frailty trajectory, this is an  
297 area that warrants urgent exploration.[34] Understanding more about the impacts of uncertainty on  
298 experiences of illness, care, and bereavement would enable us to develop interventions focused on  
299 the real-world problems uncertainty can cause.

300

### 301 Strengths and limitations

302 The rapid prioritisation approach we used enabled a diverse group of interested individuals to  
303 generate and rank research priorities in a single day. Those ranking the priorities had spent the  
304 entire day considering uncertainty in serious illness and were well placed to express considered  
305 views when ranking the list presented to them. By identifying evidence gaps before the workshop  
306 and communicating these to participants during initial presentations, we were able to focus on areas  
307 where more research is needed and incorporate the key stages of a traditional prioritisation  
308 exercise. By additionally incorporating formal qualitative analysis we increased rigour and developed  
309 a robust priority list. This approach was a more feasible and pragmatic alternative to lengthier  
310 methodologies such as the Delphi process[52, 53]. However, the rapid nature of the prioritisation  
311 process meant there was limited time to condense the findings of the focus group discussions, which  
312 risked a loss of accuracy and ranking was limited to broad research areas. We ameliorated this by  
313 subsequent analysis of focus group transcripts, which enabled us to identify detailed research



314 questions identified by participants, including areas that participants mentioned even when they  
315 weren't identified as priorities at the time.

316 We incorporated patient and carer experiences, but most participants were healthcare professionals  
317 or researchers, thus these groups were not equally represented in the ranking process. Whilst not  
318 specifically excluded, social care professionals did not attend this workshop, which limits the findings  
319 to healthcare. We recruited a UK-wide sample, but this was not an international study, and future  
320 work should explore if these findings hold internationally, though literature from 17 countries  
321 reported consistent findings on a similar topic.[11] The anonymous nature of the ranking means we  
322 could not adjust for the background of participants when analysing ranking data. The largest group  
323 of clinical participants were from palliative care backgrounds which may have shaped their views;  
324 however, a broad range of health professionals and researchers were represented, and the degree  
325 of agreement, particularly regarding the top priority of communication suggests the findings  
326 represent true consensus.

327

328

## 329 **Conclusion**

330 Through a rapid prioritisation workshop, we have identified 10 ranked priority areas for clinically  
331 focused research on uncertainty in serious illness. There was consensus that further research into  
332 managing uncertainty, particularly communication, was of higher priority than research to  
333 investigate experiences of uncertainty. Future targeted research could result in interventions to  
334 reduce the distress associated with uncertainty, unlock decision paralysis and improve illness and  
335 care experience.

336

337 **Acknowledgements**

338 Thank you to those who facilitated focus groups: Stephan Barclay, Jonathan Koffman, Anna Spathis,  
339 Ben Bowers, Sarah Hopkins, Debbie Critoph, Markus Schichtel, Ikumi Okamoto

340 We would also like to thank our patient and public involvement representatives: Roberta Lovick,  
341 Sarah Dixon, Rashmi Kumar

342 Many thanks to the workshop organiser Angela Harper & the professional services team at the  
343 Primary Care Unit, University of Cambridge for ensuring the smooth running of this study

344 Thank you to Zoe Fritz for your advice during drafting of the manuscript

345

346 **Funding:**

347 This study and SB are supported by the National Institute for Health and Care Research (NIHR)  
348 Applied Research Collaboration East of England (NIHR ARC EoE) at Cambridgeshire and Peterborough  
349 NHS Foundation Trust. BB is supported by the Wellcome Trust [225577/Z/22/Z]. SAH is jointly  
350 funded by The Dunhill Medical Trust and British Geriatrics Society [Grant ref. JBGS20\5].

351 The views expressed are those of the author(s) and not necessarily those of the NIHR or the  
352 Department of Health and Social Care.'

353

354 **Contributions:**

355 Study design: SE, SB, AS, JK

356 Securing funding: SE, SB

357 Data collection: SE, SB, AS, SAH, BB, JK

358 Analysis: SE JK

359 Paper drafting: SE, SB, AS, SAH, BB, JK

360 Approval of final version: SE, SB, AS, SAH, BB, JK

361

362 **Conflicts of Interest:**

363 The authors declare that they have no conflicts of interest.

364

365

## 366 References

- 367 1. Fox RC. The evolution of medical uncertainty. *Milbank Memorial Fund Quarterly, Health and*  
368 *Society*. 1980;58(1):1-49.
- 369 2. Etkind SN, Koffman J. Approaches to managing uncertainty in people with life-limiting  
370 conditions: role of communication and palliative care. *Postgraduate Medical Journal*. 2016.
- 371 3. Etkind SN, Bristowe K, Bailey K, Selman LE, Murtagh FEM. How does uncertainty shape  
372 patient experience in advanced illness? A secondary analysis of qualitative data. *Palliative Medicine*.  
373 2016;31(2):171-80.
- 374 4. Cox CL, Miller BM, Kuhn I, Fritz Z. Diagnostic uncertainty in primary care: what is known  
375 about its communication, and what are the associated ethical issues? *Family Practice*.  
376 2021;38(5):654-68. doi: 10.1093/fampra/cmab023.
- 377 5. Higginson IJ, Rumble C, Shipman C, Koffman J, Sleeman KE, Morgan M, et al. The value of  
378 uncertainty in critical illness? An ethnographic study of patterns and conflicts in care and decision-  
379 making trajectories. *BMC Anesthesiol*. 2016;16:11. Epub 2016/02/11. doi: 10.1186/s12871-016-  
380 0177-2. PubMed PMID: 26860461; PubMed Central PMCID: PMC4746769.
- 381 6. Han PK, Klein WM, Arora NK. Varieties of Uncertainty in Health Care A Conceptual  
382 Taxonomy. *Medical Decision Making*. 2011;31(6):828-38.
- 383 7. Etkind SN. Uncertainty in multimorbidity: a shared experience we should recognise,  
384 acknowledge and communicate. *British journal of community nursing*. 2022;27(11):540-4. doi:  
385 10.12968/bjcn.2022.27.11.540.
- 386 8. Lipshitz R, Strauss O. Coping with uncertainty: A naturalistic decision-making analysis. *Organ*  
387 *Behav Hum Decis Process* 1997;69:149–63.
- 388 9. Andersen HE, Hoeck B, Nielsen DS, Ryg J, Delmar C. A phenomenological-hermeneutic study  
389 exploring caring responsibility for a chronically ill, older parent with frailty. *Nursing Open*.  
390 2020;7(4):951-60. PubMed PMID: 32114136678.
- 391 10. Nanton V, Munday D, Dale J, Mason B, Kendall M, Murray S. The threatened self:  
392 Considerations of time, place, and uncertainty in advanced illness. *British Journal of Health*  
393 *Psychology*. 2015:n/a-n/a. doi: 10.1111/bjhp.12172.
- 394 11. Etkind SN, Li J, Louca J, Hopkins SA, Kuhn I, Spathis A, et al. Total Uncertainty: A systematic  
395 review and thematic synthesis of experiences of uncertainty in older people with advanced  
396 multimorbidity, their informal carers, and health professionals. *Age and Ageing* 2022;51(8).
- 397 12. Carey I, Shouls S, Bristowe K, Morris M, Briant L, Robinson C, et al. Improving care for  
398 patients whose recovery is uncertain. The AMBER care bundle: design and implementation. *BMJ*  
399 *supportive & palliative care*. 2015;5(4):405-11.
- 400 13. Yardley I, Yardley S, Williams H, Carson-Stevens A, Donaldson LJ. Patient safety in palliative  
401 care: a mixed-methods study of reports to a national database of serious incidents. *Palliative*  
402 *medicine*. 2018;32(8):1353-62.
- 403 14. Ombudsman PaHS. Dying without dignity Investigations by the Parliamentary and Health  
404 Service Ombudsman into complaints about end of life care. London Parliamentary and Health  
405 Service Ombudsman, 2015.
- 406 15. Sellars M, Chung O, Nolte L, Tong A, Pond D, Fetherstonhaugh D, et al. Perspectives of  
407 people with dementia and carers on advance care planning and end-of-life care: A systematic review  
408 and thematic synthesis of qualitative studies. *Palliative medicine*. 2019;33(3):274-90.
- 409 16. Oksavik; JD, Solbjør; M, Kirchhoff; R, Sogstad MKR. Games with uncertainty: the participation  
410 of older patients with multimorbidity in care planning meetings – a qualitative study. *BMC Geriatrics*.  
411 2021;21:242.
- 412 17. Bristowe K, Carey I, Hopper A, Shouls S, Prentice W, Caulkin R, et al. Patient and carer  
413 experiences of clinical uncertainty and deterioration, in the face of limited reversibility: A  
414 comparative observational study of the AMBER care bundle. *Palliat Med*. 2015;29(9):797-807. Epub  
415 2015/04/02. doi: 10.1177/0269216315578990. PubMed PMID: 25829443; PubMed Central PMCID:  
416 PMC4572938.

- 417 18. Simpkin AL, Schwartzstein RM. Tolerating Uncertainty - The Next Medical Revolution? The  
418 New England journal of medicine. 2016;375(18):1713-5. Epub 2016/11/03. doi:  
419 10.1056/NEJMp1606402. PubMed PMID: 27806221.
- 420 19. Gheihman G, Johnson M, Simpkin AL. Twelve tips for thriving in the face of clinical  
421 uncertainty. Medical Teacher. 2020;42(5):493-9. doi: 10.1080/0142159X.2019.1579308.
- 422 20. Čartolovni A, Stolt M, Scott PA, Suhonen R. Moral injury in healthcare professionals: A  
423 scoping review and discussion. Nursing ethics. 2021;28(5):590-602.
- 424 21. Di Trani M, Mariani R, Ferri R, De Berardinis D, Frigo MG. From resilience to burnout in  
425 healthcare workers during the COVID-19 emergency: the role of the ability to tolerate uncertainty.  
426 Frontiers in Psychology. 2021;12:646435.
- 427 22. van Iersel MB, Brantjes E, de Visser M, Looman N, Bazelmans E, van Asselt D. Tolerance of  
428 clinical uncertainty by geriatric residents: a qualitative study. European Geriatric Medicine.  
429 2019;10(3):517-22.
- 430 23. Begin AS, Hidrue M, Lehrhoff S, Del Carmen MG, Armstrong K, Wasfy JH. Factors Associated  
431 with Physician Tolerance of Uncertainty: an Observational Study. Journal of general internal  
432 medicine. 2022;37(6):1415-21. Epub 2021/04/28. doi: 10.1007/s11606-021-06776-8. PubMed PMID:  
433 33904030; PubMed Central PMCID: PMCPCMC8074695.
- 434 24. Koffman J, Etkind SN, Gross J, Selman L. Uncertainty and Covid-19: How are we to respond?  
435 Journal of the Royal Society of Medicine. 2020;1–6 doi: DOI: 10.1177/0141076820930665.
- 436 25. Davey Smith G, Blastland M, Munafò M. Covid-19's known unknowns. BMJ (Clinical research  
437 ed). 2020;371:m3979. doi: 10.1136/bmj.m3979.
- 438 26. Mishel MH. Reconceptualization of the Uncertainty in Illness Theory. Image: the Journal of  
439 Nursing Scholarship. 1990;22(4):256-62. doi: 10.1111/j.1547-5069.1990.tb00225.x.
- 440 27. Gough N, Ross JR, Riley J, Judson I, Koffman J. 'When something is this rare ... how do you  
441 know bad really is bad...?'-views on prognostic discussions from patients with advanced soft tissue  
442 sarcoma. BMJ Support Palliat Care. 2019;9(1):100-7. Epub 2015/12/31. doi: 10.1136/bmjspcare-  
443 2015-000898. PubMed PMID: 26715566.
- 444 28. Brashers DE. Communication and Uncertainty Management. Journal of Communication.  
445 2001;51(3):477-97. doi: 10.1111/j.1460-2466.2001.tb02892.x.
- 446 29. Krawczyk M, Gallagher R. Communicating prognostic uncertainty in potential end-of-life  
447 contexts: experiences of family members. BMC palliative care. 2016;15(1):59. doi: 10.1186/s12904-  
448 016-0133-4.
- 449 30. Meranius MS, Engstrom G. Experience of self-management of medications among older  
450 people with multimorbidity. Journal of Clinical Nursing. 2015;24(19):2757-64. PubMed PMID:  
451 rayyan-114139203.
- 452 31. Han PK, Strout TD, Gutheil C, Germann C, King B, Ofstad E, et al. How physicians manage  
453 medical uncertainty: a qualitative study and conceptual taxonomy. Medical decision making.  
454 2021;41(3):275-91.
- 455 32. Ellis-Smith C, Dawkins M, Gao W, Higginson IJ, Evans CJ. Managing clinical uncertainty in  
456 older people towards the end of life: a systematic review of person-centred tools. BMC palliative  
457 care. 2021;20(1):1-41.
- 458 33. Koffman J, Yorganci E, Yi D, Gao W, Murtagh F, Pickles A, et al. Managing uncertain recovery  
459 for patients nearing the end of life in hospital: a mixed-methods feasibility cluster randomised  
460 controlled trial of the AMBER care bundle. Trials. 2019;20(1):1-18.
- 461 34. Simpkin AL, Armstrong KA. Communicating Uncertainty: a Narrative Review and Framework  
462 for Future Research. Journal of general internal medicine. 2019;34(11):2586-91. doi:  
463 10.1007/s11606-019-04860-8.
- 464 35. Politi MC, Clark MA, Ombao H, Dizon D, Elwyn G. Communicating uncertainty can lead to less  
465 decision satisfaction: a necessary cost of involving patients in shared decision making? Health  
466 Expectations. 2011;14(1):84-91. doi: 10.1111/j.1369-7625.2010.00626.x.
- 467 36. Hill DL, Walter JK, Szymczak JE, DiDomenico C, Parikh S, Feudtner C. Seven Types of  
468 Uncertainty When Clinicians Care for Pediatric Patients With Advanced Cancer. J Pain Symptom  
469 Manage. 2020;59(1):86-94. Epub 2019/08/20. doi: 10.1016/j.jpainsymman.2019.08.010. PubMed  
470 PMID: 31425822; PubMed Central PMCID: PMCPCMC6942218.

- 471 37. Ghosh AK, Joshi S. Tools to manage medical uncertainty. *Diabetes & Metabolic Syndrome: Clinical Research & Reviews*. 2020;14(5):1529-33. doi: <https://doi.org/10.1016/j.dsx.2020.07.055>.
- 472
- 473 38. Waggoner J, Carline JD, Durning SJ. Is There a Consensus on Consensus Methodology? Descriptions and Recommendations for Future Consensus Research. *Academic Medicine*. 2016;91(5).
- 474
- 475
- 476 39. Sibbald SL, Singer PA, Upshur R, Martin DK. Priority setting: what constitutes success? A conceptual framework for successful priority setting. *BMC Health Services Research*. 2009;9(1):43. doi: [10.1186/1472-6963-9-43](https://doi.org/10.1186/1472-6963-9-43).
- 477
- 478
- 479 40. El-Harakeh A, Lotfi T, Ahmad A, Morsi RZ, Fadlallah R, Bou-Karroum L, et al. The implementation of prioritization exercises in the development and update of health practice guidelines: A scoping review. *PLoS ONE*. 2020;15(3):e0229249. doi: [10.1371/journal.pone.0229249](https://doi.org/10.1371/journal.pone.0229249).
- 480
- 481
- 482 41. Tong A, Synnot A, Crowe S, Hill S, Matus A, Scholes-Robertson N, et al. Reporting guideline for priority setting of health research (REPRISE). *BMC Medical Research Methodology*. 2019;19(1):243. doi: [10.1186/s12874-019-0889-3](https://doi.org/10.1186/s12874-019-0889-3).
- 483
- 484
- 485 42. James Lind Alliance Guidebook 2021 [cited 2023 25th April]. Available from: <https://www.jla.nihr.ac.uk/jla-guidebook/>.
- 486
- 487 43. Lund S, Richardson A, May C. Barriers to Advance Care Planning at the End of Life: An Explanatory Systematic Review of Implementation Studies. *PLoS ONE*. 2015;10(2):e0116629. doi: [10.1371/journal.pone.0116629](https://doi.org/10.1371/journal.pone.0116629).
- 488
- 489
- 490 44. Tulskey JA, Beach MC, Butow PN, Hickman SE, Mack JW, Morrison RS, et al. A Research Agenda for Communication Between Health Care Professionals and Patients Living With Serious Illness. *JAMA Internal Medicine*. 2017;177(9):1361-6. doi: [10.1001/jamainternmed.2017.2005](https://doi.org/10.1001/jamainternmed.2017.2005).
- 491
- 492
- 493 45. Harvey N, Holmes CA. Nominal group technique: An effective method for obtaining group consensus. *International Journal of Nursing Practice*. 2012;18(2):188-94. doi: <https://doi.org/10.1111/j.1440-172X.2012.02017.x>.
- 494
- 495
- 496 46. Spencer L, Ritchie J, Lewis J. Quality in qualitative evaluation: a framework for assessing research evidence. London: 2003 2003. Report No.: Occasional Series No 2.
- 497
- 498 47. Berger Z. Navigating the unknown: shared decision-making in the face of uncertainty. *Journal of general internal medicine*. 2015;30:675-8.
- 499
- 500 48. van Vliet LM. Balancing explicit with general information and realism with hope. Communication at the transition to palliative breast cancer care: Netherlands Institute for Health Services Research; 2013.
- 501
- 502
- 503 49. Cox C, Fritz Z. What is in the toolkit (and what are the tools)? How to approach the study of doctor–patient communication. *Postgraduate Medical Journal*. 2022.
- 504
- 505 50. Tunnard I, Yi D, Ellis-Smith C, Dawkins M, Higginson IJ, Evans CJ. Preferences and priorities to manage clinical uncertainty for older people with frailty and multimorbidity: a discrete choice experiment and stakeholder consultations. *BMC Geriatrics*. 2021;21(1). doi: [10.1186/s12877-021-02480-8](https://doi.org/10.1186/s12877-021-02480-8).
- 506
- 507
- 508
- 509 51. Connolly T, Coats H, DeSanto K, Jones J. The experience of uncertainty for patients, families and healthcare providers in post-stroke palliative and end-of-life care: a qualitative meta-synthesis. *Age and Ageing*. 2020. doi: [10.1093/ageing/afaa229](https://doi.org/10.1093/ageing/afaa229).
- 510
- 511 52. Jünger S, Payne SA, Brine J, Radbruch L, Brearley SG. Guidance on Conducting and REporting DElphi Studies (CREDES) in palliative care: Recommendations based on a methodological systematic review. *Palliat Med*. 2017;31(8):684-706. Epub 2017/02/14. doi: [10.1177/0269216317690685](https://doi.org/10.1177/0269216317690685). PubMed PMID: 28190381.
- 512
- 513
- 514 53. Hasson F, Keeney S, McKenna H. Research guidelines for the Delphi survey technique. *J Adv Nurs*. 2000;32(4):1008-15. Epub 2000/11/30. PubMed PMID: 11095242.
- 515
- 516
- 517
